# Supplementary material for: Structures of the R-type human Cav2.3 channel reveal conformational crosstalk of the intracellular segments
Source: Springer Nature journal article supplement (doi:10.1038/s41467-022-35026-6), 2022-11-30
Supplement: MOESM1 [file 41467_2022_35026_MOESM1_ESM.pdf]

## Supplementary Information

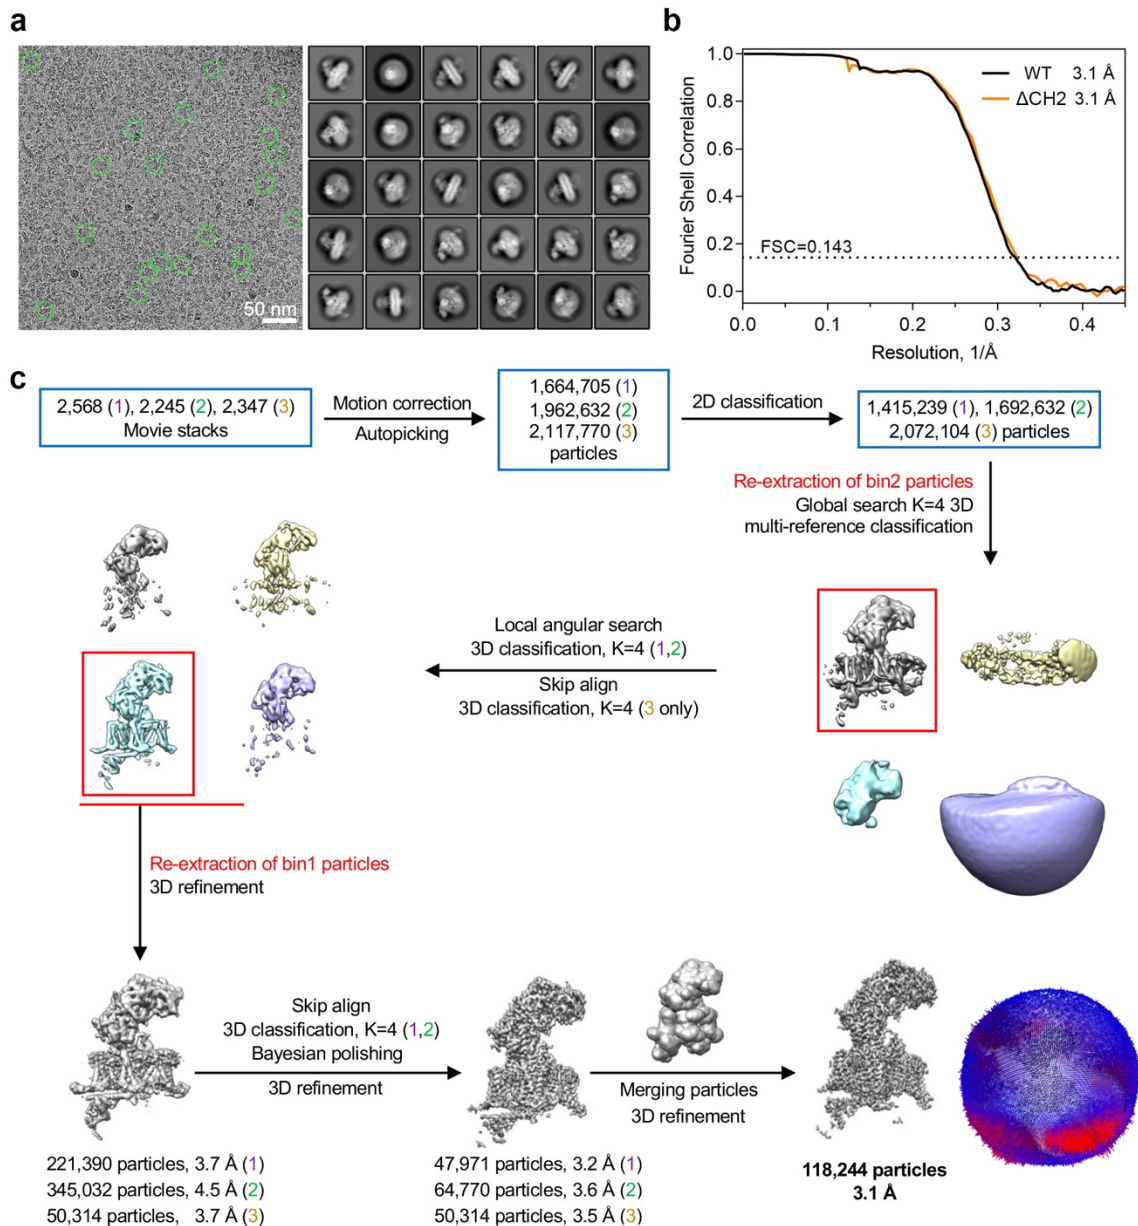

**Supplementary Fig. 1 | Structural determination of human Ca<sub>v</sub>2.3 complex.** **a** A cropped representative cryo-EM micrograph (left) and 30 classes of final 2D classification (right) of wild-type (WT) Ca<sub>v</sub>2.3 from one batch of experiment. The green circles indicate representative particles in distinct orientations. Box size for the 2D averages is 280 pixels. **b** Gold-standard Fourier Shell Correlation (FSC) curves for the overall 3D reconstructions of WT Ca<sub>v</sub>2.3 (black line) and ΔCH2 mutant protein (orange line). The FSC curves were calculated using Post-processing program in RELION. Source data are provided as a Source Data file. **c** Cryo-EM data processing of WT Ca<sub>v</sub>2.3. In total, three batches of data were combined for processing. The 2<sup>nd</sup> and 3<sup>rd</sup> datasets were collected

with the addition of SNX-482; however, there was no density discernible for toxin in the 3D EM map. Angular distribution of the final particles is shown alongside the final reconstruction. Each cylinder represents one view and the height of the cylinder is proportional to the number of particles for that view.

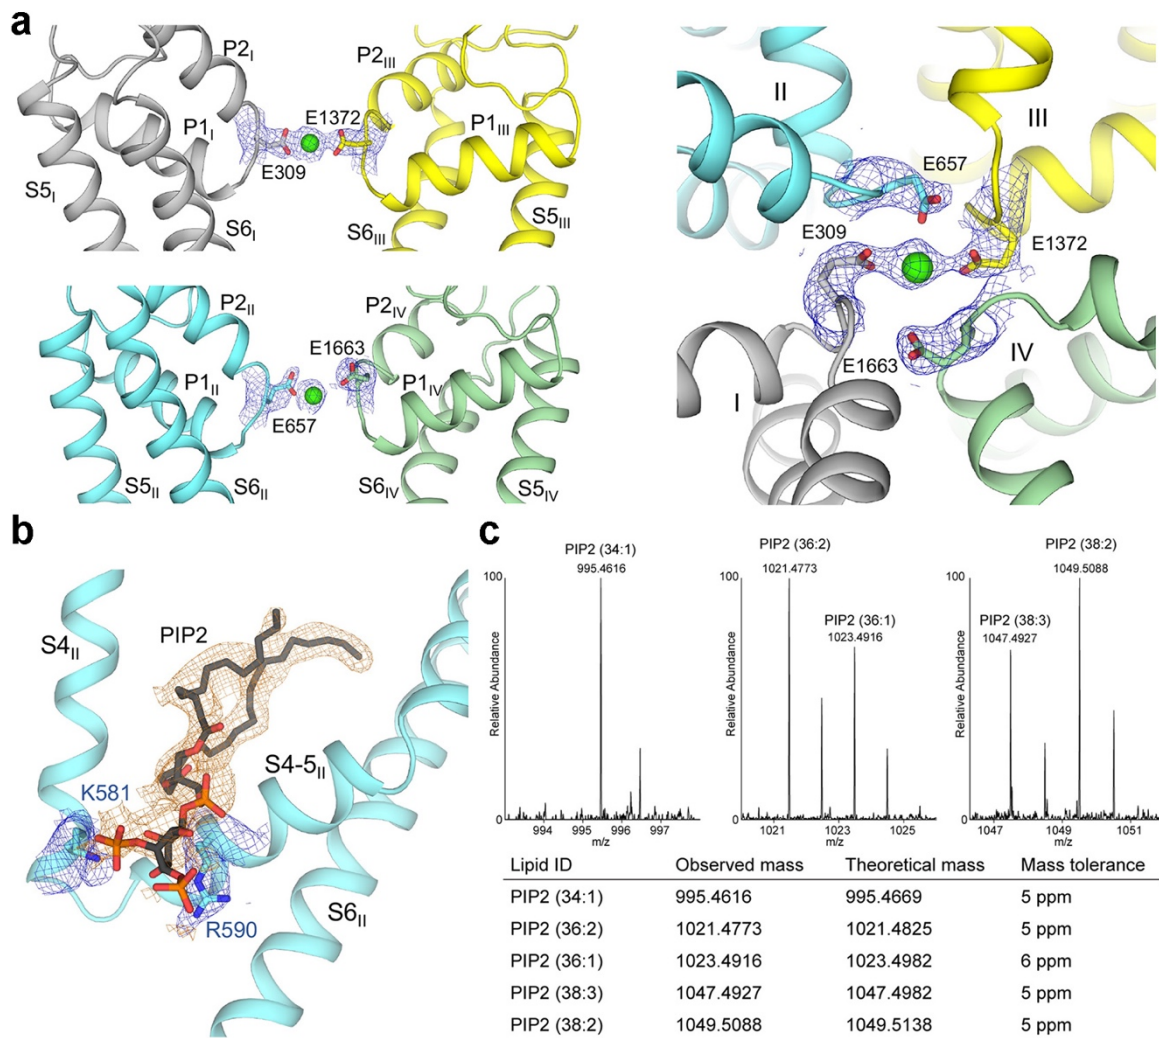

**Supplementary Fig. 2 | Structural determination of selectivity filter and phosphatidylinositol 4,5-bisphosphate (PIP2).** **a** Two side views (left) and an extracellular view (right) of the selectivity filter are shown. The EM densities for the bound  $\text{Ca}^{2+}$  ion and surrounding residues, shown as blue meshes, are contoured at  $6\sigma$  in PyMol. **b** A PIP2 molecule binds at the interface of  $\text{VSD}_{\text{II}}$  and PD. Lys581 and Arg590 may have polar interactions with PIP2. The densities for PIP2 and surrounding residues, shown as orange and blue meshes, are contoured at  $3\sigma$ . **c** Mass spectrometry analysis of PIP2 extracted from the WT  $\text{Ca}_v2.3$ . Five PIP2 species, 34:1, 36:2, 36:1, 38:3, and 38:2 PIP2 were detected.

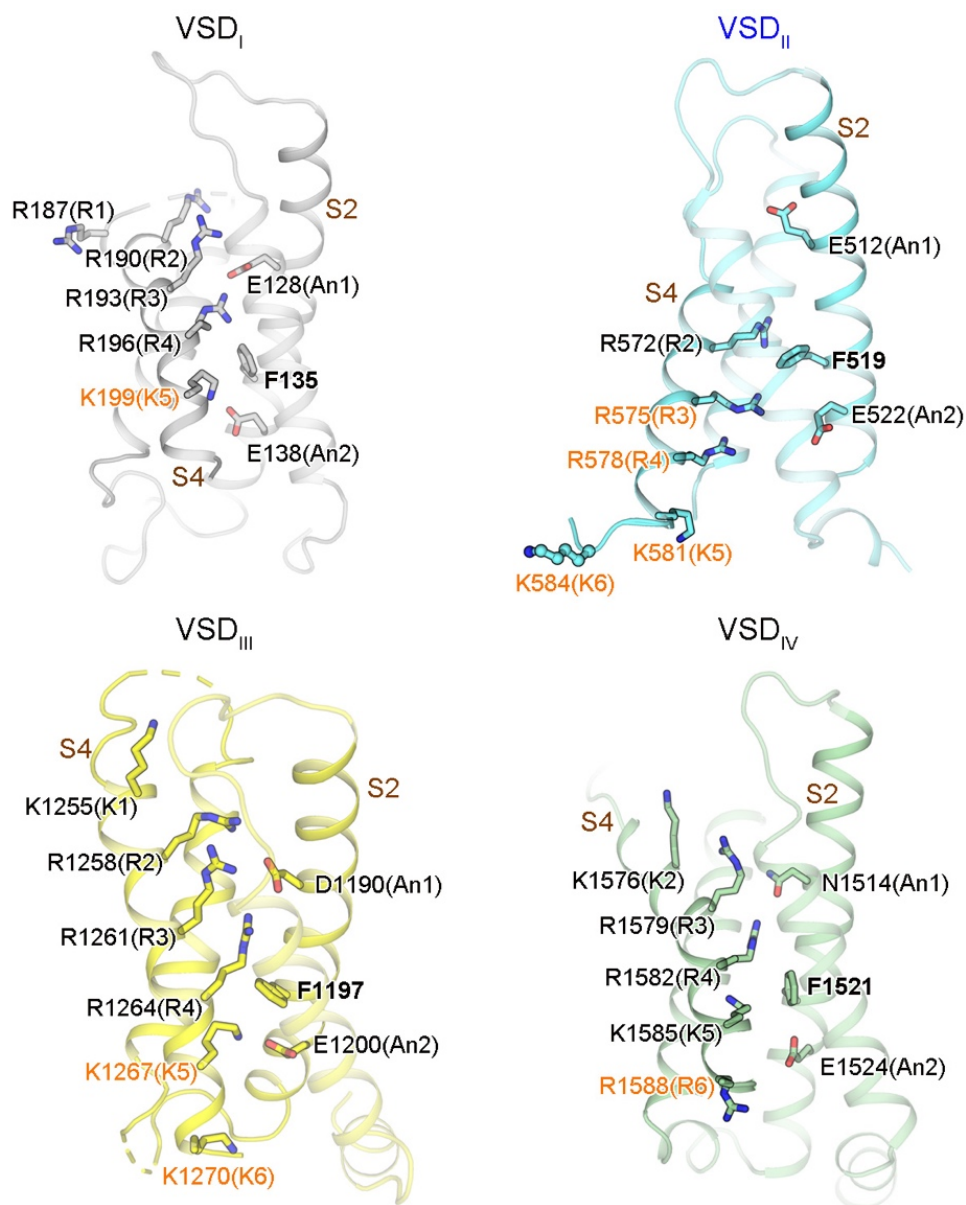

**Supplementary Fig. 3 | The four VSDs in WT Ca<sub>v</sub>2.3.** VSD<sub>II</sub> is in a down state while the other three VSDs are in the up (depolarized) conformations. The gating charge (GC) residues on S4 and their coordinating residues on S2 are shown as sticks. To make the numbering of the GC residues on each VSD consistent, the GC residue on the first helical turn of S4 is designed as R/K1. The labels for the occluding Phe on S2 are bolded. The GCs above and below the occluding Phe are labeled black and orange, respectively. An1 and An2 represent conserved acidic or polar residues on S2.

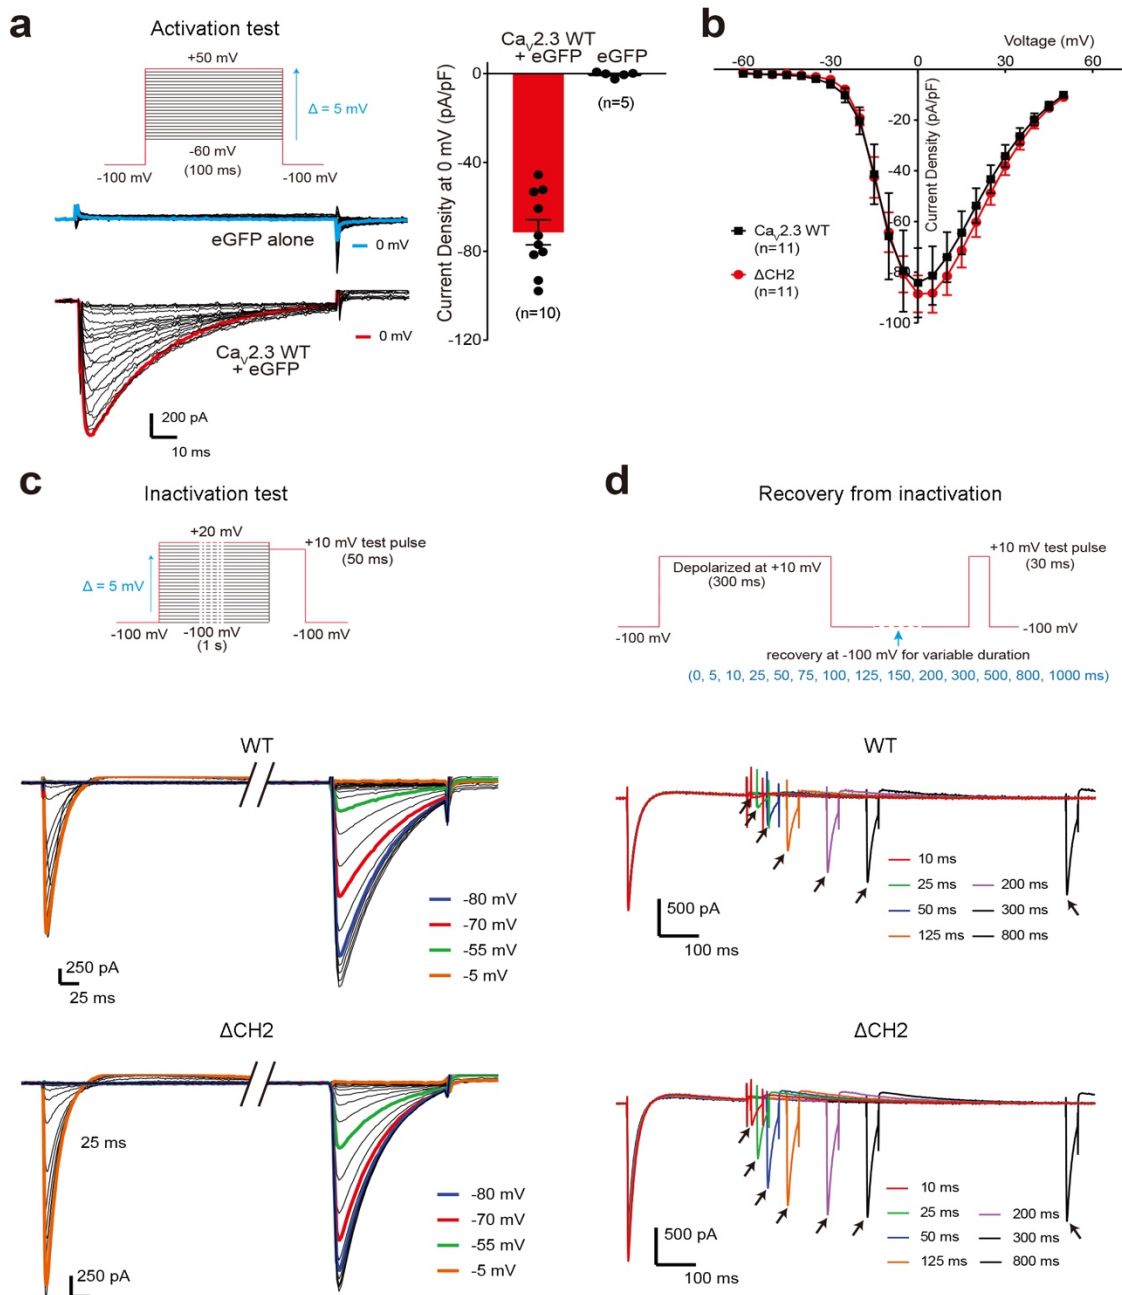

**Supplementary Fig. 4 | Electrophysiological studies of WT and  $\Delta$ CH2  $\text{Ca}_v2.3$  channels.** **a** Left: Voltage protocol and the representative currents of the HEK293T cells transfected with plasmids expressing eGFP alone or co-transfected with plasmids expressing the three  $\text{Ca}_v2.3$  subunits and eGFP. Right: The current densities recorded at 0 mV. Data in this figure are presented as mean  $\pm$  SEM. The number of tested cells is labeled in parentheses (n=10 for  $\text{Ca}_v2.3\text{WT}+\text{eGFP}$ ; n=5 for eGFP alone). Source data are provided as a Source Data file. **b** The average current-voltage relationship (I-V) curves of the WT and  $\Delta$ CH2 mutant  $\text{Ca}_v2.3$  channels are almost identical. n=11 tested cells both for WT and  $\Delta$ CH2  $\text{Ca}_v2.3$ . Source data are provided as a Source Data file. **c**

Voltage protocol and the representative currents recorded for plotting the inactivation curves of the WT and the  $\Delta$ CH2 mutant channels. Current peaks obtained at +10 mV testing pulse were used for calculation. Traces recorded at several indicated inactivation voltages are shown in different colors.

**d** Voltage protocol and the representative currents recorded for plotting the inactivation recovery of the WT and the  $\Delta$ CH2 mutant channels. Protocol and recorded currents with a pre-pulse at +10 mV are shown here as an example. Current peaks (pointed by arrows) obtained at +10 mV testing pulse were used for calculation. Traces recorded at several selected recovery time are shown in different colors.

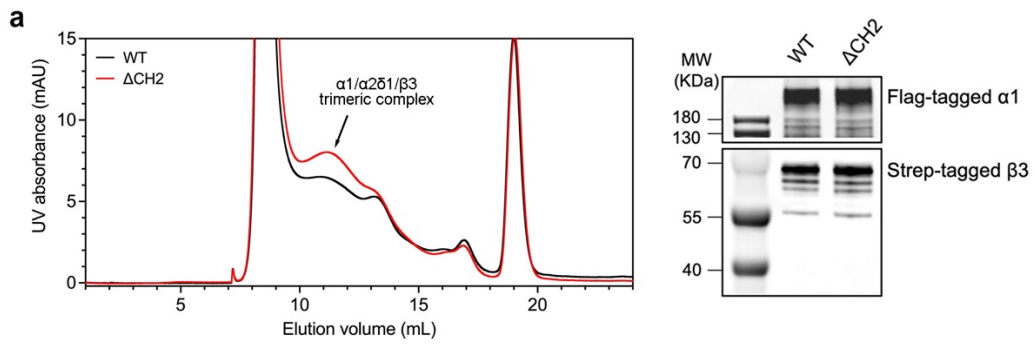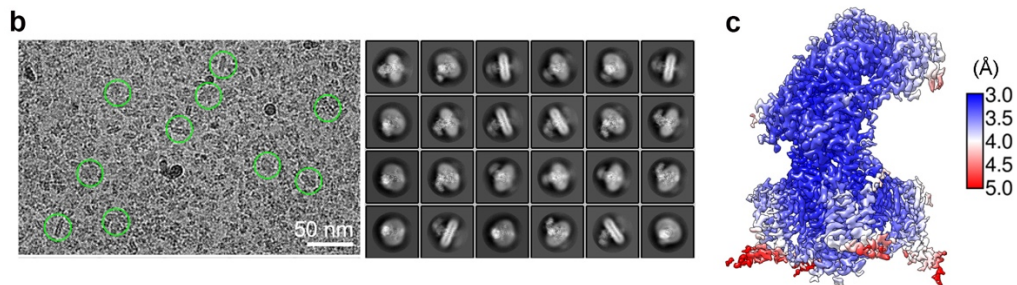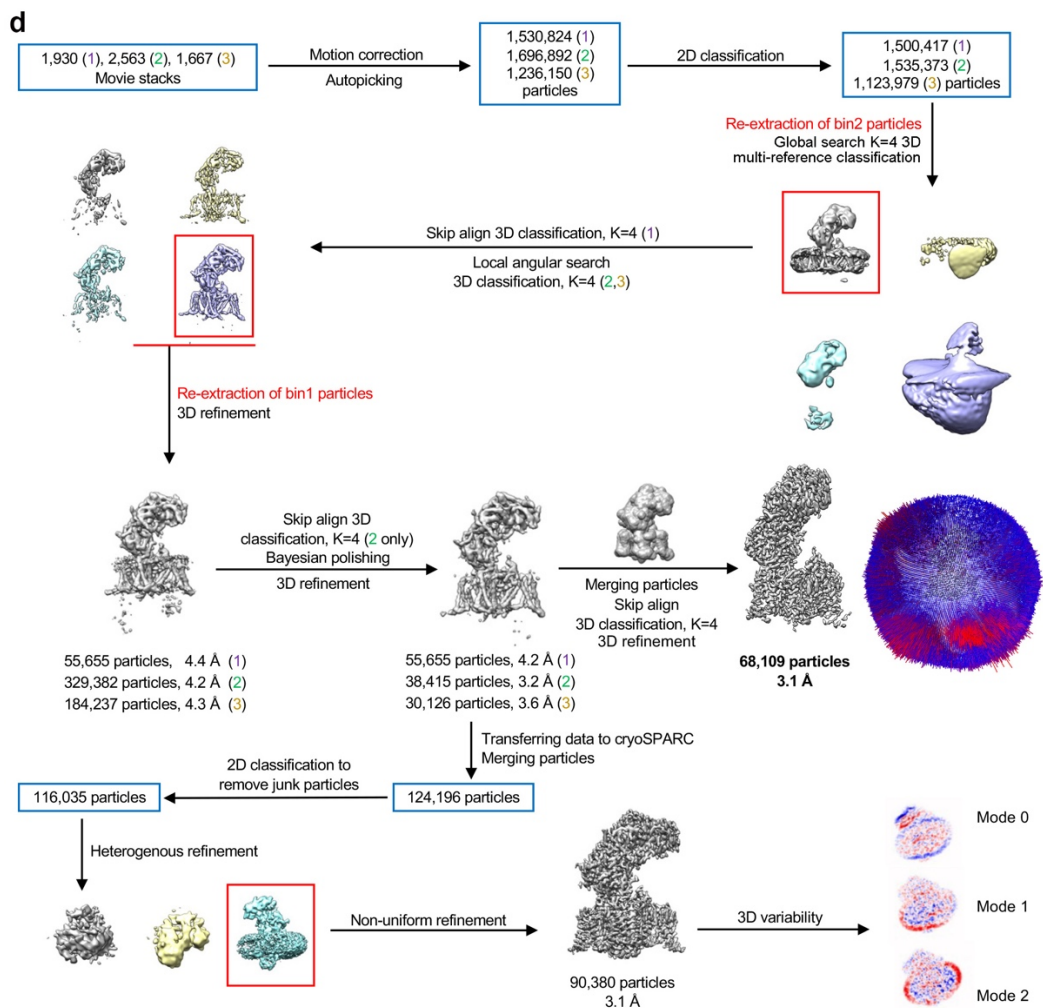

**Supplementary Fig. 5 | Structural determination of the  $\Delta$ CH2 mutant  $\text{Ca}_v2.3$ .** **a** The protein behavior and the stoichiometry of the  $\alpha 1$  and  $\beta 3$  subunits of  $\Delta$ CH2 are similar to that of WT channel. Left: Size-exclusion chromatography for proteins obtained from 1.5 L of transfected HEK293F cells. Right: Western blotting using the anti-Flag antibody against the  $\alpha 1$  subunit and the anti-Strep antibody against the  $\beta 3$  subunit. The eluents after anti-Flag affinity purification were pooled for analysis in two independent experiments with similar results. Source data are provided as a Source Data file. **b** A cropped representative cryo-EM micrograph (left) and 24 classes of final 2D classification (right) of the  $\Delta$ CH2 mutant  $\text{Ca}_v2.3$  from one batch of experiment. The green circles indicate representative particles in distinct orientations. Box size for the 2D averages is 280 pixels. **c** Heat map for the local resolutions of the  $\Delta$ CH2  $\text{Ca}_v2.3$  EM reconstruction. **d** Cryo-EM data processing workflow. Three batches of data were combined for processing. 3D variability analysis was performed in cryoSPARC. Angular distribution of the final particles is shown alongside the final reconstruction. Each cylinder represents one view and the height of the cylinder is proportional to the number of particles for that view.



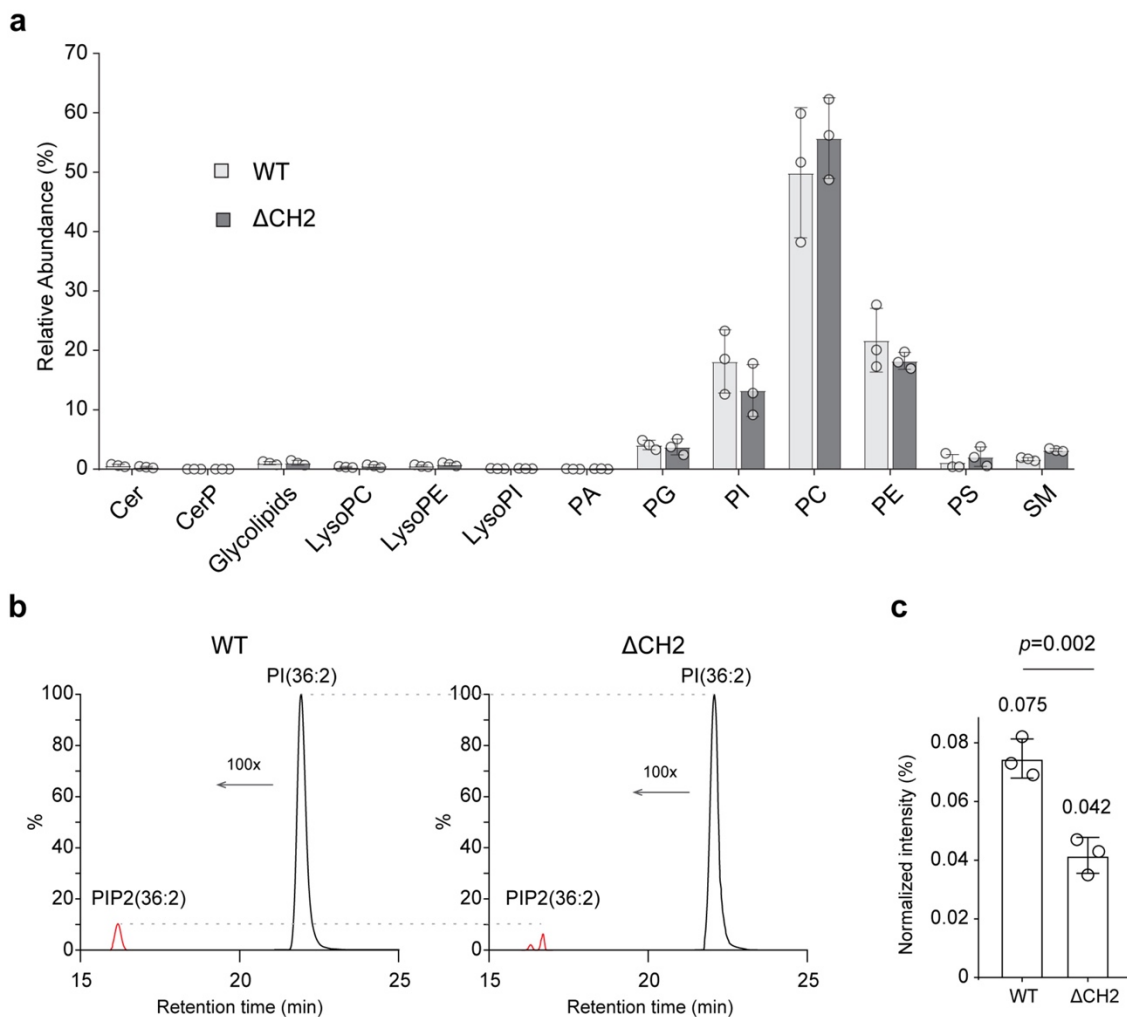

**Supplementary Fig. 6 | PIP2 is less abundant in  $\Delta$ CH2 mutant  $Ca_v2.3$ .** **a** Lipidomic quantification of the co-purified lipids in WT and  $\Delta$ CH2  $Ca_v2.3$ . Phosphatidylinositol (PI) and phosphatidylethanolamine (PE) are reduced in the  $\Delta$ CH2 mutant sample. Data in this figure are presented as mean  $\pm$  SD,  $n=3$  biologically independent experiments. Source data are provided as a Source Data file. **b** Extracted ion chromatograms (EICs) of PIP2 (36:2) and PI (36:2) in WT (left) and  $\Delta$ CH2 (right)  $Ca_v2.3$ . The relative abundance of PIP2 (36:2) in each sample was normalized to PI (36:2) abundance. **c** Normalized intensities of PIP2 (36:2) in WT and  $\Delta$ CH2 protein samples from three replicate experiments. The PIP2 peaks (panel b) were separately integrated. The mean AUC (area under the curve) values were labeled above the bars. Two-tailed unpaired t-test was used for statistical analysis. Source data are provided as a Source Data file.

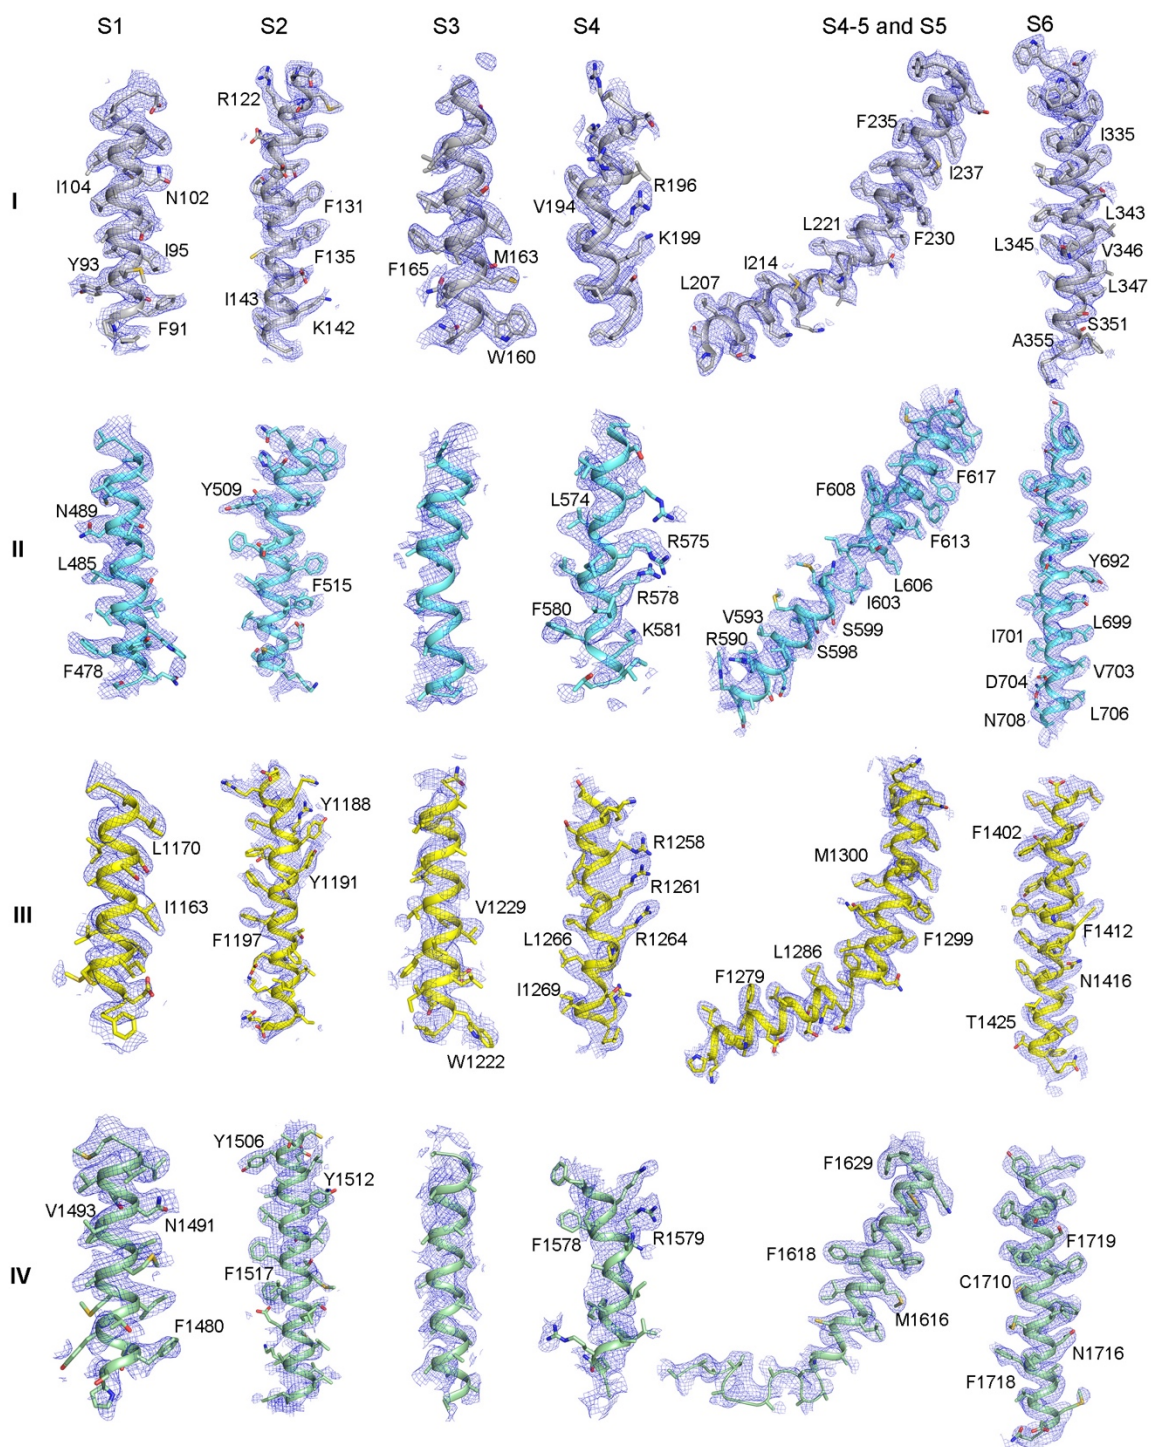

**Supplementary Fig. 7 | EM maps for the S1-S6 segments in each repeat of  $\Delta$ CH2 Ca<sub>v</sub>2.3.** All the densities shown as blue meshes are contoured at 4  $\sigma$ . Specifically, S3<sub>II</sub>, S3<sub>IV</sub> and S4-5<sub>IV</sub> were assigned as poly-Ala because of the low resolutions.

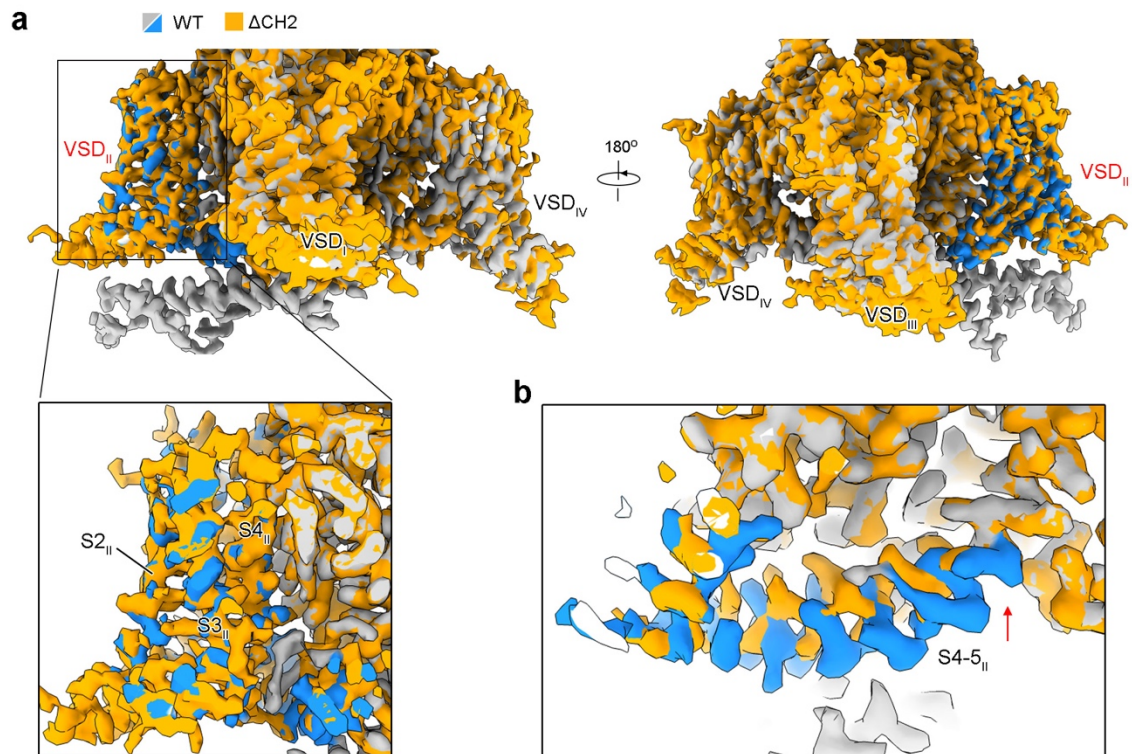

**Supplementary Fig. 8 | VSD<sub>II</sub> in  $\Delta$ CH2 remains a down state, but the S4-5<sub>II</sub> displays an evident structural shift.** **a** The overall structures of the  $\alpha$ 1 subunit of  $\Delta$ CH2 and WT Ca<sub>v</sub>2.3 are nearly identical. VSD<sub>II</sub> and the S4-5<sub>II</sub> segment in WT reconstruction are highlighted with bright blue. Inset: The densities for VSD<sub>II</sub> in WT and  $\Delta$ CH2 Ca<sub>v</sub>2.3 can be well aligned, supporting that VSD<sub>II</sub> in  $\Delta$ CH2 still exhibits down conformation. **b** The upward movement of S4-5<sub>II</sub> upon deletion of CH2<sub>II</sub>.

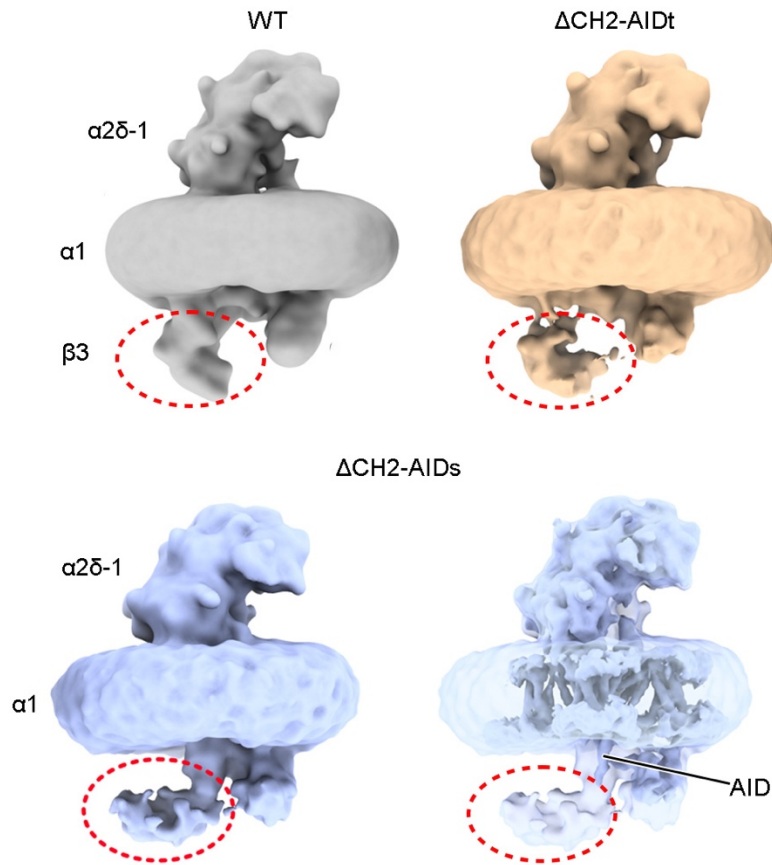

**Supplementary Fig. 9 | Two potential conformations of the  $\beta 3$  subunit in  $\Delta$ CH2  $\text{Ca}_v2.3$ .** To visualize the cytosolic segments, representative reconstructions from 3D variability analysis (3DVA) of  $\Delta$ CH2 were low pass-filtered to 15 Å. Top: The possible  $\beta$  subunit in  $\Delta$ CH2-AIDt (wheat, 1<sup>st</sup> frame of 3DVA) shares similar conformation with WT  $\text{Ca}_v2.3$  (gray). Bottom: In  $\Delta$ CH2-AIDs (light blue, 10<sup>th</sup> frame of 3DVA), blob densities that associated with the straight AID may indicate a distinct position of the  $\beta$  subunit relative to the  $\alpha 1$  subunit upon the conformational shift of AID.

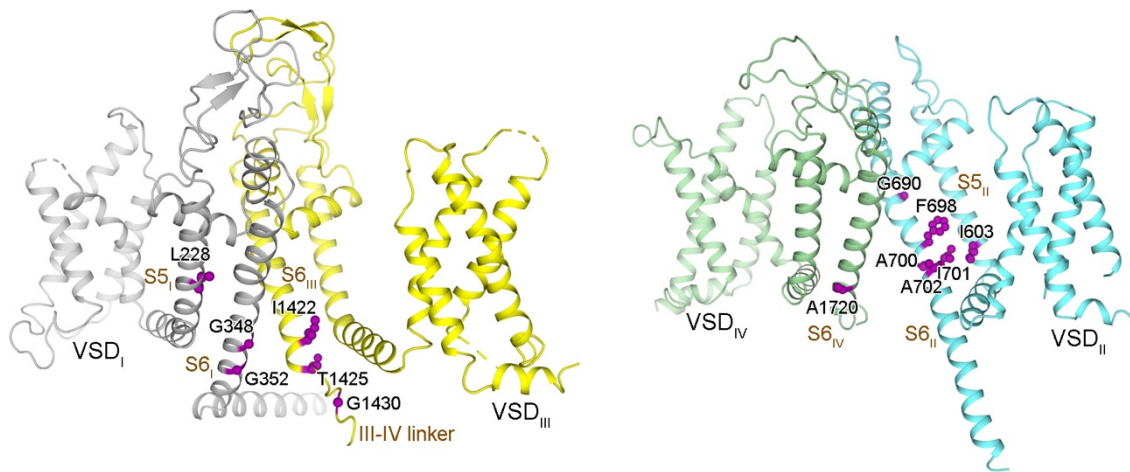

**Supplementary Fig. 10 | Structural mapping of the epileptic encephalopathy related mutations identified in  $Ca_v2.3$ .** The corresponding effects of the mutations can be found in <https://www.uniprot.org/uniprotkb/Q15878> and the reference<sup>1</sup>. Two side views of the diagonal repeats are shown. Purple spheres highlight the positions of disease-related residues.

**Supplementary Table 1 | Cryo-EM data collection, refinement and validation statistics**

|                                                  | WT Ca <sub>v</sub> 2.3<br>(EMD-28529)<br>(PDB 8EPL) | Ca <sub>v</sub> 2.3-ΔCH2<br>(EMD-28530)<br>(PDB 8EPM) |
|--------------------------------------------------|-----------------------------------------------------|-------------------------------------------------------|
| <b>Data collection and processing</b>            |                                                     |                                                       |
| Magnification                                    | 105,000                                             | 105,000                                               |
| Voltage (kV)                                     | 300                                                 | 300                                                   |
| Electron dose (e-/Å <sup>2</sup> )               | 50                                                  | 50                                                    |
| Defocus range (μm)                               | -2.1~-1.9                                           | -2.1~-1.9                                             |
| Pixel size (Å)                                   | 1.114                                               | 1.114                                                 |
| Symmetry                                         | C1                                                  | C1                                                    |
| Initial particle images (no.)                    | 5,745,107                                           | 4,463,866                                             |
| Final particle images (no.)                      | 118,244                                             | 68,109                                                |
| Map resolution (Å)                               | 3.1                                                 | 3.1                                                   |
| FSC threshold                                    | 0.143                                               | 0.143                                                 |
| <b>Refinement</b>                                |                                                     |                                                       |
| Initial model used (PDB code)                    | 7MIY                                                | WT Ca <sub>v</sub> 2.3                                |
| Model resolution (Å)                             | 3.4                                                 | 3.2                                                   |
| FSC threshold                                    | 0.5                                                 | 0.5                                                   |
| Map sharpening <i>B</i> factor (Å <sup>2</sup> ) | -88                                                 | -67                                                   |
| Model composition                                |                                                     |                                                       |
| Non-hydrogen atoms                               | 20954                                               | 15458                                                 |
| Protein residues                                 | 2546                                                | 1939                                                  |
| Ligands                                          | 25                                                  | 17                                                    |
| <i>B</i> factors (Å <sup>2</sup> )               |                                                     |                                                       |
| Protein                                          | 61.38                                               | 57.30                                                 |
| Ligand                                           | 68.09                                               | 96.19                                                 |
| R.m.s deviations                                 |                                                     |                                                       |
| Bond lengths (Å)                                 | 0.003                                               | 0.003                                                 |
| Bond angles (°)                                  | 0.507                                               | 0.531                                                 |
| Validation                                       |                                                     |                                                       |
| MolProbity score                                 | 1.72                                                | 1.82                                                  |
| Clashscore                                       | 7.22                                                | 7.74                                                  |
| Poor rotamers (%)                                | 0.27                                                | 0.55                                                  |
| Ramachandran plot                                |                                                     |                                                       |
| Favored (%)                                      | 95.35                                               | 94.08                                                 |
| Allowed (%)                                      | 4.57                                                | 5.81                                                  |
| Disallowed (%)                                   | 0.08                                                | 0.10                                                  |

**Supplementary References:**

1. Helbig, K.L. et al. De Novo Pathogenic Variants in CACNA1E Cause Developmental and Epileptic Encephalopathy with Contractures, Macrocephaly, and Dyskinesias. *Am J Hum Genet* **103**, 666-678 (2018).
